# Supplementary material for: Three novel Cu6S6 cluster-based coordination compounds: synthesis, framework modulation and the sensing of small molecules and Fe3+ ions
Source: Royal Society of Chemistry journal article supplement (doi:10.1039/c6dt02264b), 2016-01-01
Supplement: c6dt02264b1.pdf [file c6dt02264b1.pdf]

## Three novel Cu<sub>6</sub>S<sub>6</sub> cluster-based coordination compounds: synthesis, framework modulation and the sensing for small molecules and Fe<sup>3+</sup> ion

Jiang-Feng Song<sup>\*a</sup>, Si-Zhe Li<sup>a</sup>, Rui-Sha Zhou<sup>a</sup>, Jia-Shao<sup>a</sup>, Xiao-Min Qiu<sup>a</sup>, Ying-Ying Jia<sup>a</sup>, Jun Wang<sup>a</sup>, Xiao Zhang<sup>\*b</sup>

### Figure caption

**Table S1** Crystal and structure refinement data for compounds **1-3**.

**Table S2** Bond lengths (Å) and Angles (deg) for compounds **1-3**.

**Fig. S1** The 3D supramolecular network in compound **1**.

**Fig. S2** Experimental and simulated X-ray diffraction patterns (a) for compound **1**, (b) for compound **2**, (c) for compound **3**.

**Fig. S3** The IR spectra of compounds **1-3**.

**Fig. S4** The TGA polts of compounds **1-3**.

**Fig. S5** (a) Emission spectra, (b) Emission intensities, (c) the luminescence photographs of compound **2** in different solvent emulsions under UV light.

**Fig. S6** (a) Emission spectra, (b) Emission intensities, (c) the luminescence photographs of compound **3** in different solvent emulsions under UV light.

**Fig. S7** Fluorescence titration of compound **2** dispersed in ethanol by gradual addition of analytes in ethanol, (a) NB, (b) 2-NT.

**Fig. S8** Fluorescence titration of compound **3** dispersed in ethanol by gradual addition of analytes in ethanol, (a) NB, (b) 2-NT.

**Fig. S9** (a) Emission spectra, (b) Emission intensities, (c) the luminescence photographs of compound **2** in ethanol emulsion containing different metal ions under UV light.

**Fig. S10** (a) Emission spectra, (b) Emission intensities, (c) the luminescence photographs of compound **3** in ethanol emulsion containing different metal ions under UV light.

**Fig. S11** Fluorescence titration of **2** dispersed in ethanol with the addition of different concentrations of Fe<sup>3+</sup> (excited at 390 nm).

**Fig. S12** Fluorescence titration of **3** dispersed in ethanol with the addition of different concentrations of Fe<sup>3+</sup> (excited at 390 nm).

---

<sup>a</sup> Department of Chemistry, North University of China, Taiyuan, Shanxi, 030051, P. R. China. E-mail: jfsong0129@gmail.com.

<sup>b</sup> MIT Key Laboratory of Critical Materials Technology for New Energy Conversion and Storage, School of Chemistry and Chemical Engineering, Harbin Institute of Technology, Harbin, 150080, P. R. China. E-mail: zhangx@hit.edu.cn.

Table S1 Crystal and structure refinement data for compounds **1-3**.

| Compound                                                     | <b>1</b>                                                                       | <b>2</b>                                                                                        | <b>3</b>                                                                                       |
|--------------------------------------------------------------|--------------------------------------------------------------------------------|-------------------------------------------------------------------------------------------------|------------------------------------------------------------------------------------------------|
| Empirical formula                                            | C <sub>30</sub> H <sub>30</sub> Cu <sub>6</sub> N <sub>12</sub> S <sub>6</sub> | C <sub>30</sub> H <sub>30</sub> Br <sub>4</sub> Cu <sub>10</sub> N <sub>12</sub> S <sub>6</sub> | C <sub>30</sub> H <sub>30</sub> Cu <sub>12</sub> I <sub>6</sub> N <sub>12</sub> S <sub>6</sub> |
| Formula weight                                               | 1132.26                                                                        | 1706.06                                                                                         | 2274.90                                                                                        |
| Crystal system                                               | monoclinic                                                                     | monoclinic                                                                                      | monoclinic                                                                                     |
| Space group                                                  | <i>P2<sub>1</sub>/c</i>                                                        | <i>I2/m</i>                                                                                     | <i>P2<sub>1</sub>/n</i>                                                                        |
| <i>a</i> , Å                                                 | 22.1787(8)                                                                     | 8.5779(3)                                                                                       | 11.5116(4)                                                                                     |
| <i>b</i> , Å                                                 | 11.5351(3)                                                                     | 17.6149(7)                                                                                      | 11.0849(4)                                                                                     |
| <i>c</i> , Å                                                 | 18.4943(6)                                                                     | 15.0573(6)                                                                                      | 20.7805(7)                                                                                     |
| β, deg                                                       | 114.620(2)                                                                     | 96.829                                                                                          | 97.415(3)                                                                                      |
| Volume (Å <sup>3</sup> )                                     | 4301.3(2)                                                                      | 2259.00(15)                                                                                     | 2629.52(16)                                                                                    |
| <i>Z</i>                                                     | 4                                                                              | 2                                                                                               | 2                                                                                              |
| ρ <sub>calc</sub> /gcm <sup>-3</sup>                         | 1.748                                                                          | 2.508                                                                                           | 2.873                                                                                          |
| Absorption coeff.                                            | 3.243                                                                          | 8.463                                                                                           | 8.544                                                                                          |
| θ range (°)                                                  | 2.99 to 25.10                                                                  | 3.49 to 25.10                                                                                   | 3.09 to 25.10                                                                                  |
| Reflections collected                                        | 16009                                                                          | 4405                                                                                            | 9691                                                                                           |
| Unique                                                       | 7571 [R(int) = 0.0273]                                                         | 2082 (R(int) = 0.0335)                                                                          | 4680 (R(int) = 0.0321)                                                                         |
| Completeness                                                 | 99.0 %                                                                         | 99.7 %                                                                                          | 99.8%                                                                                          |
| Goodness-of-fit                                              | 1.103                                                                          | 1.018                                                                                           | 0.905                                                                                          |
| <i>R</i> indexes [ <i>I</i> > 2σ( <i>I</i> )] <sup>[a]</sup> | <i>R</i> <sub>1</sub> = 0.0434<br><i>wR</i> <sub>2</sub> = 0.1057              | <i>R</i> <sub>1</sub> = 0.0352<br><i>wR</i> <sub>2</sub> = 0.0674                               | <i>R</i> <sub>1</sub> = 0.0302<br><i>wR</i> <sub>2</sub> = 0.0478                              |
| <i>R</i> (all data) <sup>[a]</sup>                           | <i>R</i> <sub>1</sub> = 0.0624<br><i>wR</i> <sub>2</sub> = 0.1182              | <i>R</i> <sub>1</sub> = 0.0496<br><i>wR</i> <sub>2</sub> = 0.0739                               | <i>R</i> <sub>1</sub> = 0.0505<br><i>wR</i> <sub>2</sub> = 0.0519                              |

$$[a] R_1 = \frac{\sum |F_o| - |F_c|}{\sum |F_o|}; wR = \left[ \frac{\sum w(F_o^2 - F_c^2)^2}{\sum w(F_o^2)^2} \right]^{1/2}$$

Table S2 Bond lengths (Å) and Angles (deg) for compound 1-3

| Compound 1        |            |                     |            |
|-------------------|------------|---------------------|------------|
| Cu(1)-N(4)        | 2.023(7)   | Cu(5)-S(5)          | 2.235(2)   |
| Cu(1)-S(1)        | 2.229(2)   | Cu(5)-S(6)          | 2.257(2)   |
| Cu(1)-S(2)        | 2.249(2)   | Cu(6)-N(9)          | 2.040(7)   |
| Cu(2)-N(1)        | 2.013(7)   | Cu(6)-S(4)          | 2.238(2)   |
| Cu(2)-S(2)#1      | 2.243(2)   | Cu(6)-S(6)#2        | 2.271(2)   |
| Cu(2)-S(3)        | 2.250(2)   | Cu(1)-Cu(2)         | 2.7061(15) |
| Cu(3)-N(6)        | 2.049(7)   | Cu(4)-Cu(5)         | 2.7358(15) |
| Cu(3)-S(1)#1      | 2.240(2)   | Cu(5)-Cu(6)         | 2.7770(15) |
| Cu(3)-S(3)        | 2.269(2)   | Cu(2)-Cu(3)#1       | 2.8079(15) |
| Cu(4)-N(11)       | 2.037(7)   | Cu(4)-Cu(6)         | 2.9375(15) |
| Cu(4)-S(4)        | 2.241(2)   | Cu(6)-Cu(4)#2       | 2.9566(15) |
| Cu(4)-S(5)#2      | 2.251(2)   | Cu(3)-Cu(1)#1       | 2.9676(15) |
| Cu(5)-N(7)        | 2.013(7)   | Cu(1)-Cu(3)         | 2.9875(15) |
| N(4)-Cu(1)-S(1)   | 124.7(2)   | N(11)-Cu(4)-S(4)    | 121.0(2)   |
| N(4)-Cu(1)-S(2)   | 109.9(2)   | N(11)-Cu(4)-S(5)#2  | 109.8(2)   |
| S(1)-Cu(1)-S(2)   | 118.14(9)  | S(4)-Cu(4)-S(5)#2   | 120.27(9)  |
| N(1)-Cu(2)-S(2)#1 | 121.4(2)   | N(7)-Cu(5)-S(5)     | 124.1(2)   |
| N(1)-Cu(2)-S(3)   | 120.6(2)   | N(7)-Cu(5)-S(6)     | 119.3(2)   |
| S(2)#1-Cu(2)-S(3) | 111.38(9)  | S(5)-Cu(5)-S(6)     | 110.49(9)  |
| N(6)-Cu(3)-S(1)#1 | 119.7(2)   | N(9)-Cu(6)-S(4)     | 121.5(2)   |
| N(6)-Cu(3)-S(3)   | 108.8(2)   | N(9)-Cu(6)-S(6)#2   | 110.0(2)   |
| S(1)#1-Cu(3)-S(3) | 121.51(9)  | S(4)-Cu(6)-S(6)#2   | 118.92(9)  |
| Compound 2        |            |                     |            |
| Cu(3)-N(4)        | 1.933(4)   | Cu(2)-S(2)#2        | 2.2660(12) |
| Cu(4)-N(2)        | 2.031(5)   | Br(1)-Cu(4)         | 2.3719(8)  |
| Cu(1)-N(1)        | 2.037(5)   | Cu(1)-Cu(2)         | 2.7988(9)  |
| Cu(2)-N(3)        | 2.033(4)   | Cu(2)-Cu(2)#4       | 2.7780(12) |
| Cu(1)-S(2)        | 2.2587(13) | Cu(2)-Cu(2)#3       | 3.0311(13) |
| Cu(2)-S(1)        | 2.2335(13) | S(1)-Cu(2)-S(2)#4   | 117.21(5)  |
| N(3)-Cu(2)-S(2)#4 | 113.92(11) | N(4)-Cu(3)-N(4)#5   | 167.3(2)   |
| N(1)-Cu(1)-S(2)   | 118.73(5)  | N(2)-Cu(4)-Br(1)    | 119.87(3)  |
| S(2)#1-Cu(1)-S(2) | 114.38(7)  | Br(1)#3-Cu(4)-Br(1) | 118.62(5)  |
| N(3)-Cu(2)-S(1)   | 118.93(11) | S(2)#3-Cu(1)-S(2)   | 114.38(7)  |
| Compound 3        |            |                     |            |
| N(2)-Cu(6)#6      | 2.008(4)   | Cu(5)-I(2)#7        | 2.7532(8)  |
| N(3)-Cu(3)        | 1.995(4)   | Cu(2)-S(1)          | 2.2485(14) |
| N(1)-Cu(1)        | 2.046(4)   | Cu(2)-S(2)          | 2.2555(14) |
| N(6)-Cu(2)        | 2.037(4)   | Cu(4)-S(3)          | 2.3563(14) |
| N(5)-Cu(5)        | 2.041(4)   | Cu(1)-S(3)          | 2.2180(14) |
| I(1)-Cu(6)        | 2.5868(8)  | Cu(1)-S(2)#8        | 2.2767(15) |
| I(1)-Cu(4)        | 2.6859(8)  | Cu(3)-S(3)          | 2.2085(14) |
| I(1)-Cu(5)        | 2.7174(8)  | Cu(3)-S(1)#8        | 2.2498(15) |

|                   |            |                   |            |
|-------------------|------------|-------------------|------------|
| I(2)-Cu(4)        | 2.5799(8)  | Cu(5)-Cu(6)       | 2.5530(10) |
| I(2)-Cu(4)#7      | 2.6600(8)  | Cu(4)-Cu(5)       | 2.6063(10) |
| I(2)-Cu(5)#7      | 2.7532(8)  | Cu(2)-Cu(3)       | 2.7422(10) |
| I(3)-Cu(6)        | 2.5196(8)  | Cu(2)-Cu(1)       | 2.8652(9)  |
| I(3)-Cu(5)        | 2.6271(8)  | Cu(4)-Cu(4)#7     | 2.8118(14) |
| Cu(4)-I(2)#7      | 2.6600(8)  | Cu(1)-Cu(3)#8     | 2.9496(10) |
| N(6)-Cu(2)-S(1)   | 117.10(12) | N(5)-Cu(5)-I(2)#7 | 106.44(11) |
| N(6)-Cu(2)-S(2)   | 118.51(12) | I(3)-Cu(5)-I(2)#7 | 106.27(3)  |
| S(1)-Cu(2)-S(2)   | 114.73(5)  | I(1)-Cu(5)-I(2)#7 | 111.90(3)  |
| S(3)-Cu(4)-I(2)   | 108.49(4)  | N(1)-Cu(1)-S(3)   | 125.38(12) |
| S(3)-Cu(4)-I(2)#7 | 106.10(4)  | N(1)-Cu(1)-S(2)#8 | 107.54(12) |
| I(2)-Cu(4)-I(2)#7 | 115.12(3)  | S(3)-Cu(1)-S(2)#8 | 120.81(6)  |
| S(3)-Cu(4)-I(1)   | 98.92(4)   | N(3)-Cu(3)-S(3)   | 123.82(13) |
| I(2)-Cu(4)-I(1)   | 110.60(3)  | N(3)-Cu(3)-S(1)#8 | 111.78(14) |
| I(2)#7-Cu(4)-I(1) | 115.96(3)  | S(3)-Cu(3)-S(1)#8 | 118.63(5)  |
| N(5)-Cu(5)-I(3)   | 109.35(12) | N(2)#9-Cu(6)-I(3) | 130.76(13) |
| N(5)-Cu(5)-I(1)   | 109.80(12) | N(2)#9-Cu(6)-I(1) | 107.85(13) |
| I(3)-Cu(5)-I(1)   | 112.83(3)  | I(3)-Cu(6)-I(1)   | 121.37(3)  |

Symmetry transformations: #1  $-x+1, -y, -z+1$ ; #2  $-x, -y+1, -z+2$ ; #3  $x, 2-y, z$ ; #4  $2-x, y, 2-z$ ; #5  $1-x, y, 2-z$ ; #6  $x, y+1, z$ ; #7  $2-x, -y, 2-z$ ; #8  $2-x, 1-y, 2-z$ ; #9  $x, y-1, z$ .

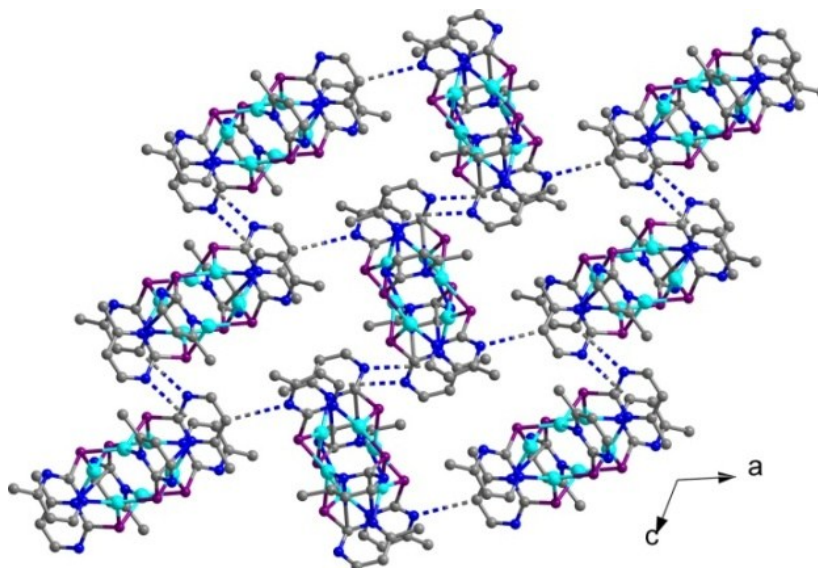

Fig. S1 The 3D supramolecular network in compound **1**.

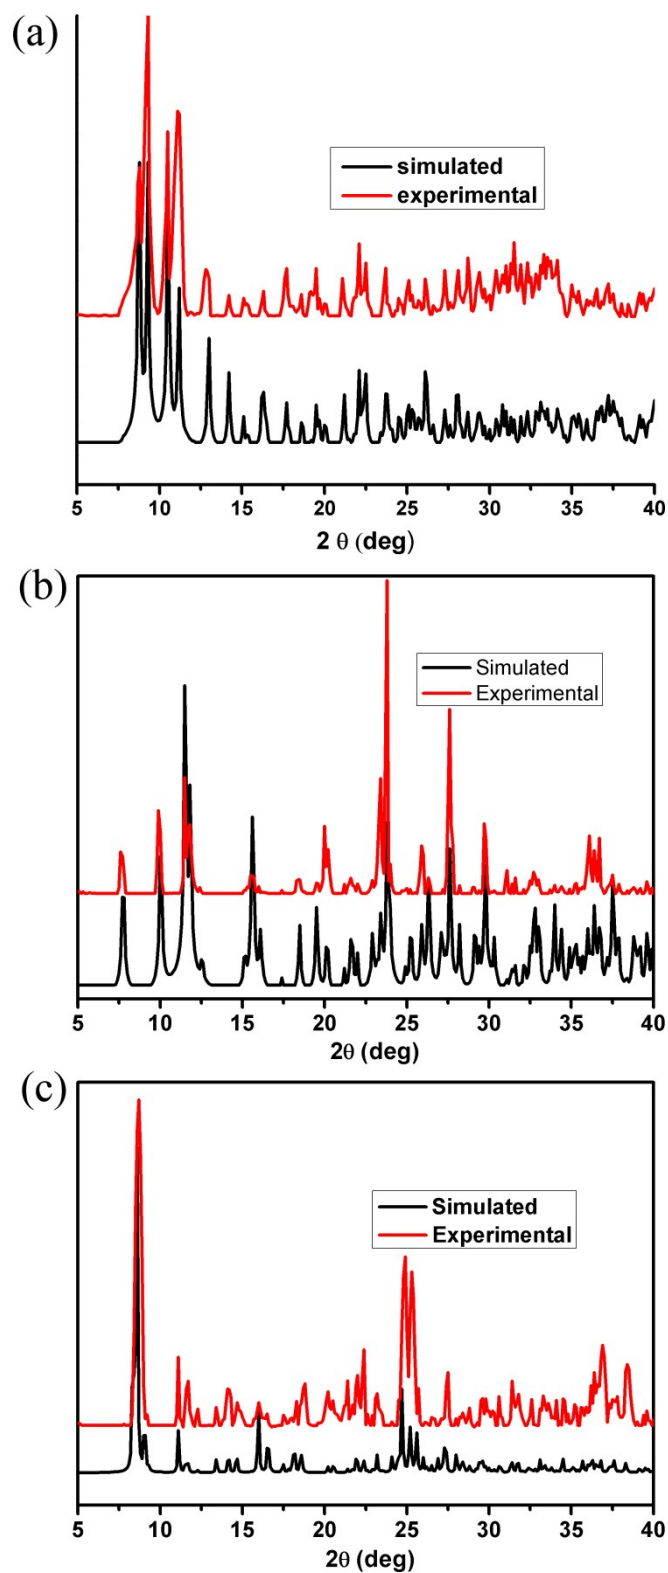

Fig. S2 Experimental and simulated X-ray diffraction patterns (a) for compound 1, (b) for compound 2, (c) for compound 3.

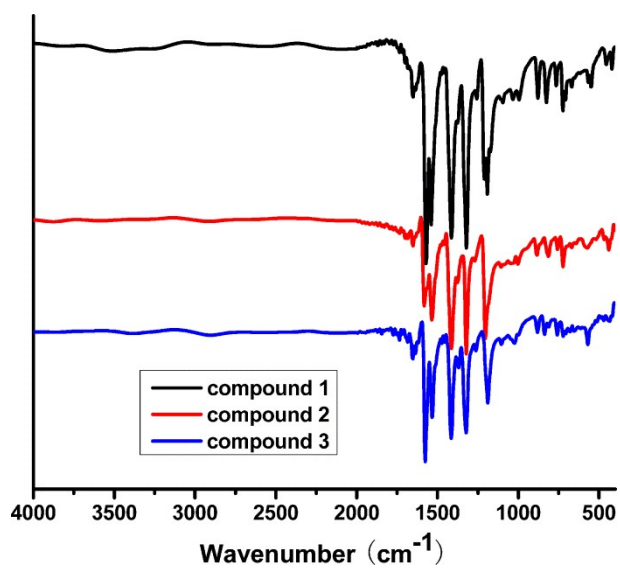

Fig. S3 The IR spectra of compounds 1-3.

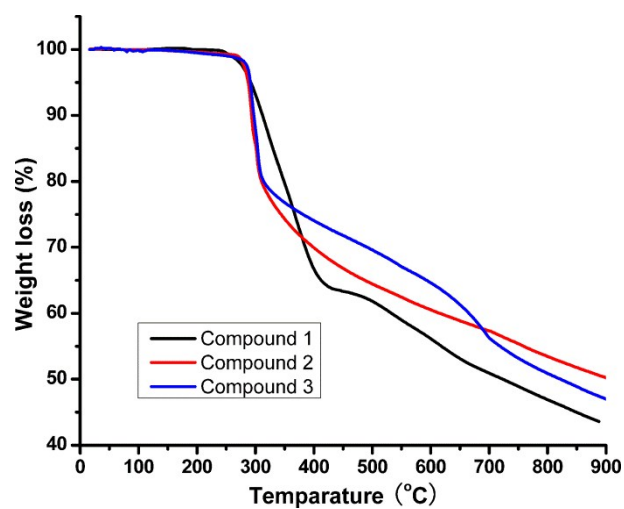

Fig. S4 The TGA plots of compounds 1-3.

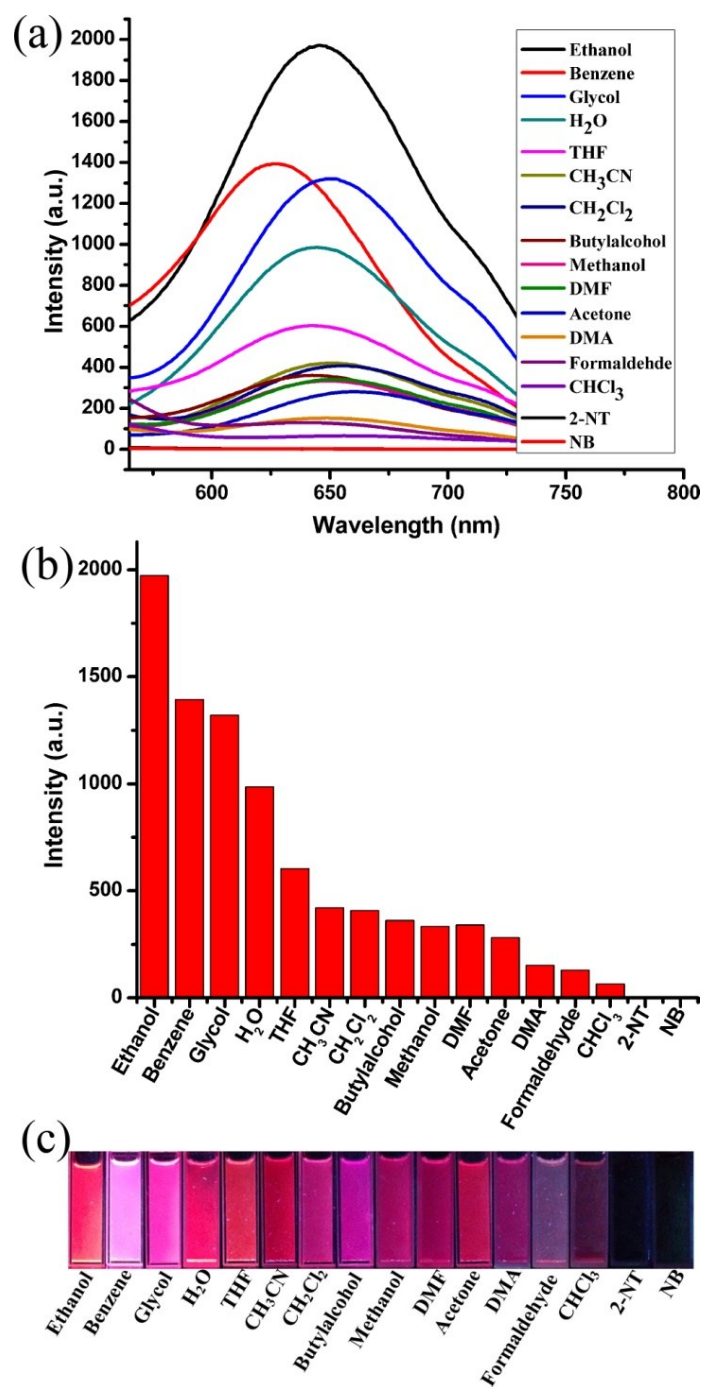

Fig. S5 (a) Emission spectra, (b) Emission intensities, (c) the luminescence photographs of compound **2** in different solvent emulsions under UV light.

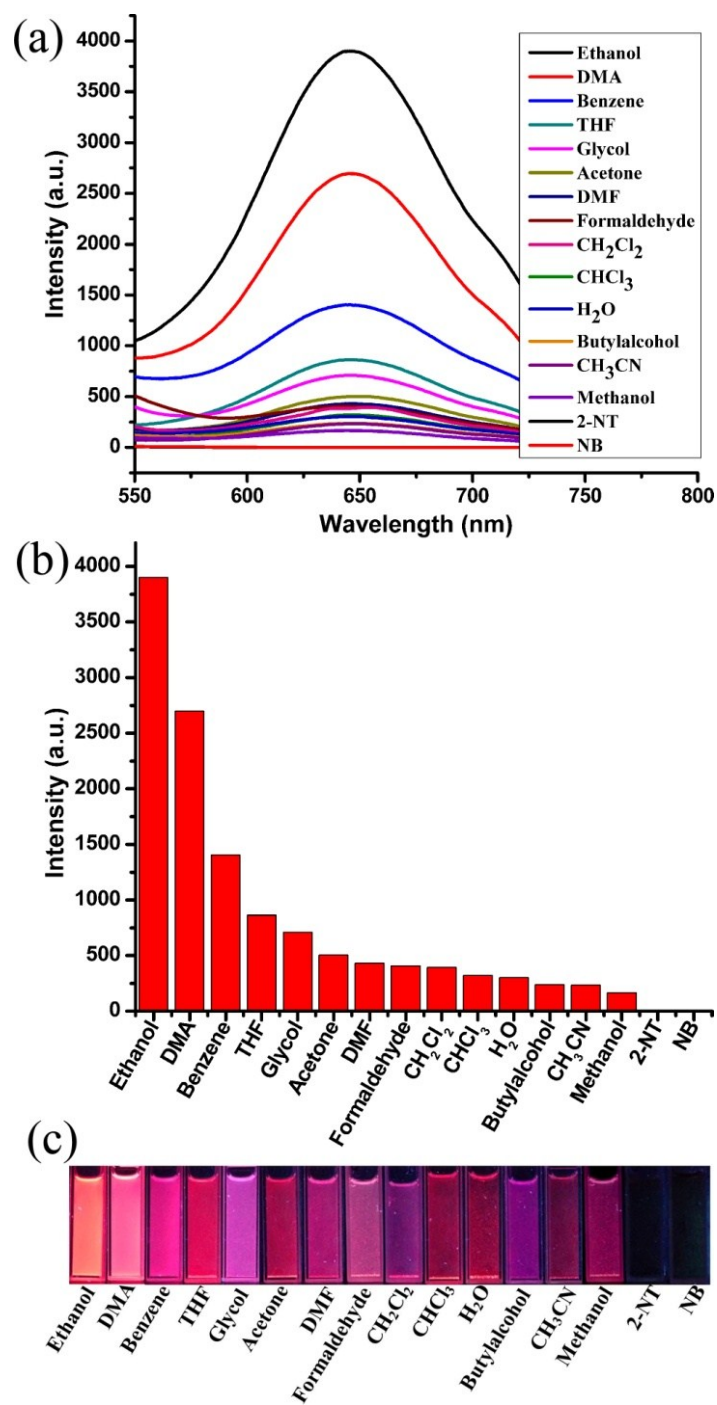

Fig. S6 (a) Emission spectra, (b) Emission intensities, (c) the luminescence photographs of compound **3** in different solvent emulsions under UV light.



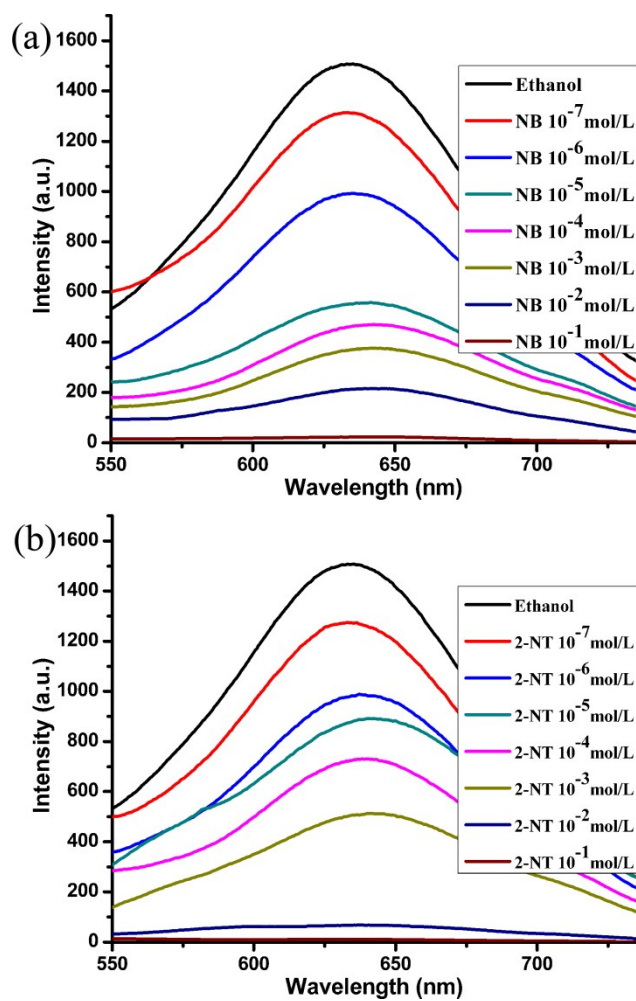

Fig. S7 Fluorescence titration of compound 2 dispersed in ethanol by gradual addition of analytes in ethanol, (a) NB, (b) 2-NT.

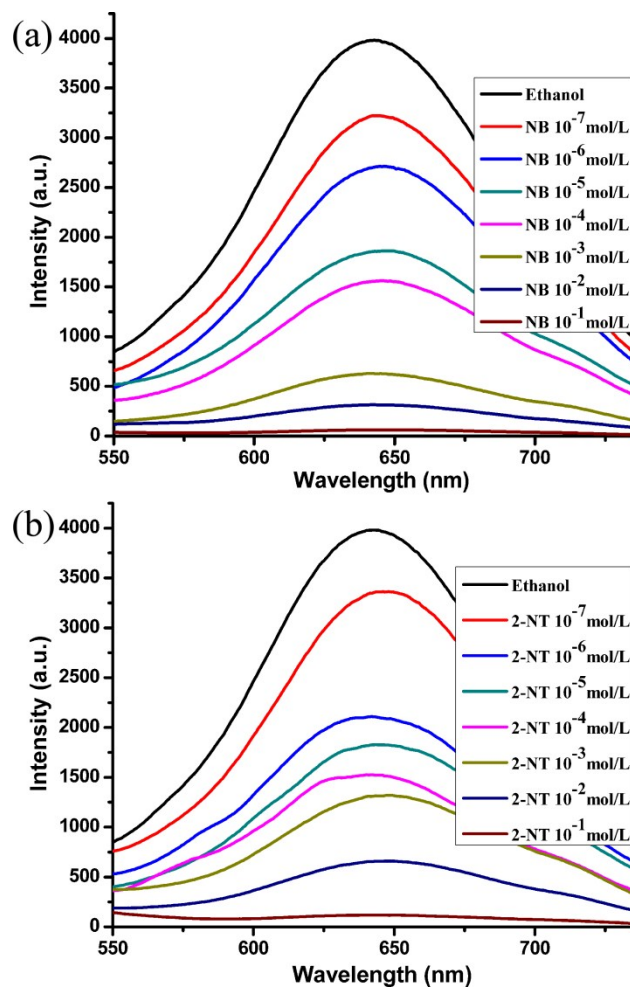

Fig. S8 Fluorescence titration of compound 3 dispersed in ethanol by gradual addition of analytes in ethanol, (a) NB, (b) 2-NT.

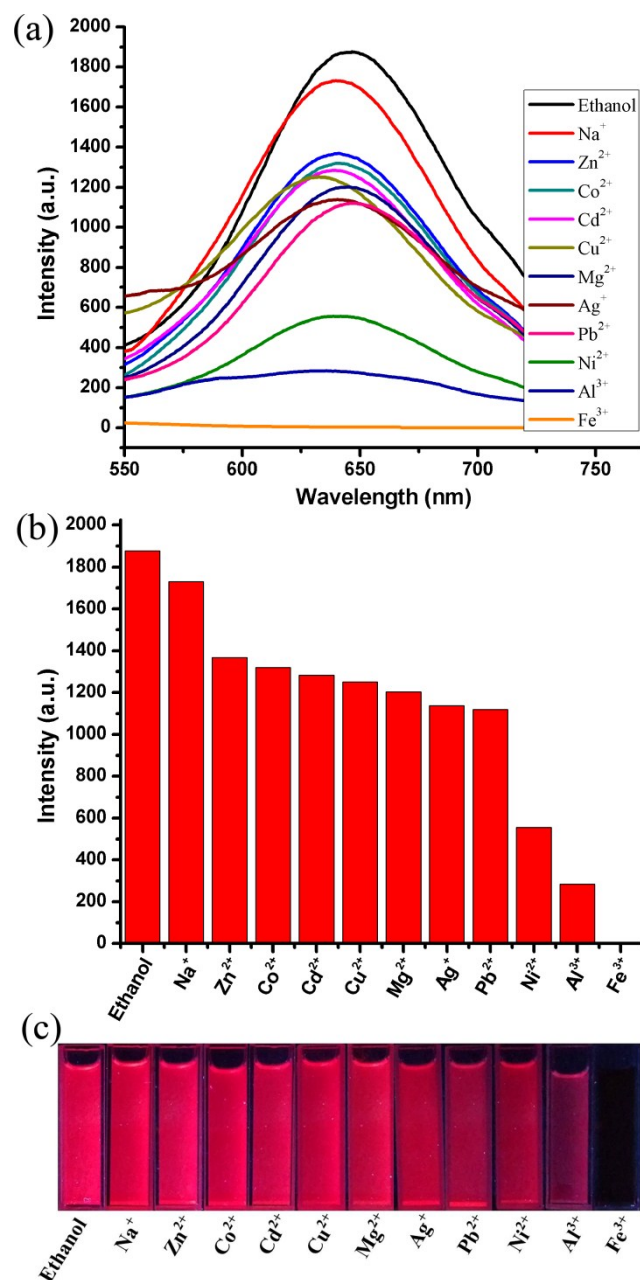

Fig. S9 (a) Emission spectra, (b) Emission intensities, (c) the luminescence photographs of compound 2 in ethanol emulsion containing different metal ions under UV light.

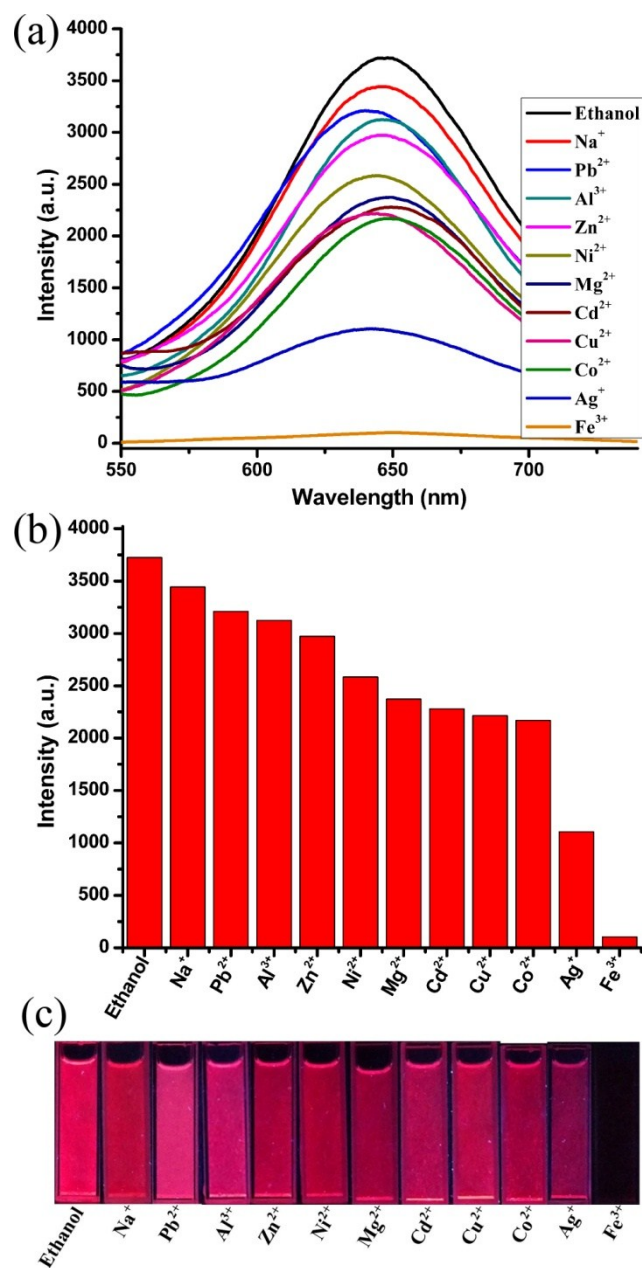

Fig. S10 (a) Emission spectra, (b) Emission intensities, (c) the luminescence photographs of compound 3 in ethanol emulsion containing different metal ions under UV light.

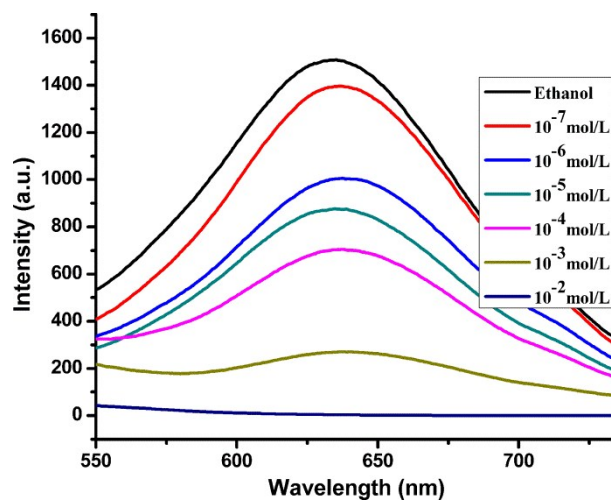

Fig. S11 Fluorescence titration of **2** dispersed in ethanol with the addition of different concentrations of Fe<sup>3+</sup> (excited at 390 nm).

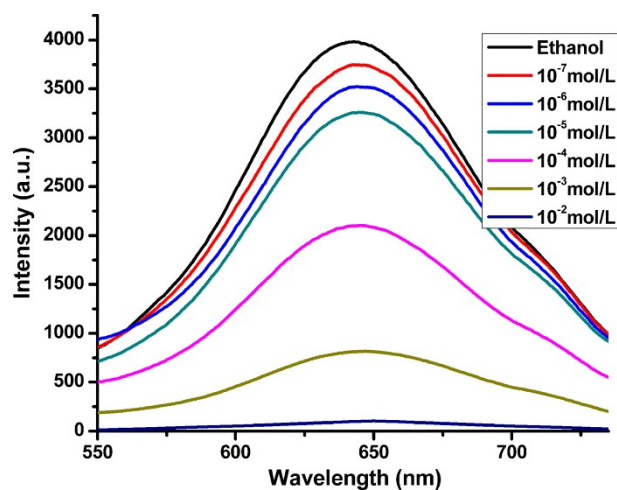

Fig. S12 Fluorescence titration of **3** dispersed in ethanol with the addition of different concentrations of Fe<sup>3+</sup> (excited at 390 nm).
